## RESEARCH ARTICLE

# Biological activity of the enantiomers of 3-methylhentriacontane, a queen pheromone of the ant *Lasius niger*

Marine Motais de Narbonne<sup>1</sup>, Jelle S. van Zweden<sup>2</sup>, Jan E. Bello<sup>3,\*</sup>, Tom Wenseleers<sup>2</sup>, Jocelyn G. Millar<sup>3</sup> and Patrizia d’Ettorre<sup>1,‡</sup>

## ABSTRACT

Queen pheromones are essential for regulation of the reproductive division of labor in eusocial insect species. Although only the queen is able to lay fertilized eggs and produce females, in some cases workers may develop their ovaries and lay male-destined eggs, thus reducing the overall colony efficiency. As long as the queen is healthy, it is usually in the workers’ collective interest to work for the colony and remain sterile. Queens signal their fertility via pheromones, which may have a primer effect, affecting the physiology of workers, or a releaser effect, influencing worker behavior. The queen pheromone of the ant *Lasius niger* was among the first queen pheromones of social insects to be identified. Its major component is 3-methylhentriacontane (3-MeC<sub>31</sub>), which is present in relatively large amounts on the queen’s cuticle and on her eggs. 3-MeC<sub>31</sub> regulates worker reproduction by inhibiting ovarian development. Most monomethyl-branched hydrocarbons can exist in two stereoisomeric forms. The correct stereochemistry is fundamental to the activity of most bioactive molecules, but this has rarely been investigated for methyl-branched hydrocarbons. Here, we tested the bioactivity of the (*S*)- and (*R*)-enantiomers of 3-MeC<sub>31</sub>, and found that whereas both enantiomers were effective in suppressing worker ovarian development, (*S*)-3-MeC<sub>31</sub> appeared to be more effective at suppressing aggressive behavior by workers. This suggests that the natural pheromone may be a mixture of the two enantiomers. The enantiomeric ratio produced by queens remains unknown because of the small amounts of the compound available from each queen.

**KEY WORDS:** Social insects, Cuticular hydrocarbons, Chirality, Worker reproduction

## INTRODUCTION

Reproductive division of labor is one of the defining principles of eusociality (Oster and Wilson, 1978). Consequently, in most eusocial groups only one or a few individuals reproduce, even though all individuals usually possess functional reproductive organs and in principle are still able to successfully reproduce. In hymenopteran species, workers may develop their ovaries and lay unfertilized eggs that develop into haploid males, sometimes even in the presence of the queen (Alaux et al., 2007; Cuvillier-Hot et al.,

2004; Wenseleers and Ratnieks, 2006a). Males produced from worker-laid eggs have the chance to fertilize virgin queens, which will then found new colonies. However, worker reproduction in the presence of a fertile queen would reduce the overall colony efficiency because reproductive workers do not work, thus harming the collective worker interests as well as those of the queen (Cole, 1984; Wenseleers et al., 2004). In most species, queens or workers eliminate eggs laid by reproducing workers, or attack them directly in a behavior known as policing (Ratnieks and Visscher, 1989; Trivers and Hare, 1976; Wenseleers et al., 2005). Given that worker reproduction may be futile when an effective policing system is in place, in many species this leads workers to respond directly to the presence and fertility of the queen by self-restraining their reproduction, i.e. by not developing their ovaries in queenright colonies (Oi et al., 2015; Wenseleers and Ratnieks, 2006a,b).

The primary method used by the queen to signal her presence to workers is the use of chemical signals known as queen pheromones (Le Conte and Hefetz, 2008). Until recently, only the queen pheromone of the honey bee, *Apis mellifera*, had been identified (Keeling et al., 2003; Le Conte and Hefetz, 2008). In addition to reducing worker ovarian development, queen pheromones also inhibit aggression by workers, so that the compounds have both primer and releaser pheromone functions (Vergoz et al., 2007). In ants and wasps, a number of correlative studies suggested that queen fertility is signaled through a subset of the cuticular lipids, which are composed mostly of long-chain hydrocarbons (Cuvillier-Hot et al., 2004; d’Ettorre et al., 2004; Dietemann et al., 2003; Peeters et al., 1999; Sledge et al., 2001). More recently, this was confirmed for several species of ants, a vespine wasp and a bumblebee, with queen-characteristic hydrocarbons being shown to inhibit ovary development by workers (Holman et al., 2010a, 2013; Van Oystaeyen et al., 2014).

In the ant *L. niger*, previous work has demonstrated that 3-methylhentriacontane (3-MeC<sub>31</sub>) acts as the queen pheromone (Holman et al., 2010a,b). Like the queen pheromone of the honey bee, this pheromone is both a primer (inhibiting worker ovary development) and a releaser (inhibiting worker aggression). This molecule can exist in two stereoisomeric forms, the (*R*)- and the (*S*)-enantiomers. The correct stereochemistry is often crucial for bioactivity of most natural molecules, and in many species, the presence of traces of the ‘unnatural’ enantiomer can result in a significant loss of bioactivity (Mori, 1998, 2007). For *L. niger*, the bioactivity of the two stereoisomers, however, has not been investigated; to date, behavioral experiments have employed only the racemic (i.e. 1:1) mixture of the two isomers (Holman et al., 2010a). The two main possibilities are that only one stereoisomer is active, or that the (*R*)- and (*S*)-enantiomers could both be active, and play the same or different roles. Thus, the goal of our study was to test the bioactivity of the (*R*)- and (*S*)-enantiomers of the queen pheromone of *L. niger* as inhibitors of ovary development in

<sup>1</sup>Laboratory of Experimental and Comparative Ethology, University Paris 13, Sorbonne Paris Cité, Villeteuse 93430, France. <sup>2</sup>Laboratory of Socioecology and Social Evolution, Department of Biology, KU Leuven, Naamsestraat 59 – Box 2466, Leuven 3000, Belgium. <sup>3</sup>Departments of Entomology and Chemistry, University of California, 900 University Avenue, Riverside, CA 92521, USA.

\*Present address: Department of Evolutionary Neuroethology, Max Planck Institute for Chemical Ecology, Hans-Knoell-Strasse 8, Jena 07745, Germany.

‡Author for correspondence (dettorre@leec.univ-paris13.fr)

Received 7 December 2015; Accepted 1 March 2016

workers, and as modulators of aggression by workers. A recent study showed that in 36 monomethyl-branched cuticular hydrocarbons (MBCs) isolated from species from nine different orders of insects, the stereochemistry of the MBCs was conserved, with all of the compounds having the (*R*)-configuration regardless of chain length or methyl branch position (Bello et al., 2015). Thus, we hypothesized that the 3-MeC<sub>31</sub> queen pheromone of *L. niger* has the (*R*)-configuration. Determining the absolute configuration of the queen-produced hydrocarbon would require extraction and purification of this compound from >1000 mature queens, based on estimates of the amount present in a single queen. This was not logistically feasible, and so we hoped to indirectly address the question of the likely absolute configuration of the naturally produced 3-MeC<sub>31</sub> via bioassays.

## MATERIALS AND METHODS

### Synthesis of the enantiomers of 3-MeC<sub>31</sub>

Optima grade solvents (Fisher Scientific, Pittsburgh, PA, USA) were utilized for all reactions, work-ups and purifications. Tetrahydrofuran (THF) was distilled from sodium/benzophenone under an argon atmosphere. <sup>1</sup>H and <sup>13</sup>C NMR spectra were recorded with a Varian INOVA-400 (400 and 100.5 MHz, respectively) spectrometer (Palo Alto, CA, USA), as CDCl<sub>3</sub> solutions. <sup>1</sup>H NMR chemical shifts are expressed in ppm relative to residual CHCl<sub>3</sub> (7.27 ppm) and <sup>13</sup>C NMR chemical shifts are reported relative to CDCl<sub>3</sub> (77.16 ppm). Solvent extracts of reaction mixtures were dried over anhydrous Na<sub>2</sub>SO<sub>4</sub> and concentrated by rotary evaporation under reduced pressure. Crude products were purified by vacuum flash chromatography or column flash chromatography on silica gel (230–400 mesh; Fisher Scientific). Yields refer to isolated yields of chromatographically pure products. Mass spectra were obtained with a Hewlett-Packard (HP) 6890 gas chromatograph (Avondale, PA, USA) interfaced to an HP 5973 mass-selective detector, in EI mode (70 eV) with helium as the carrier gas. The gas chromatograph was equipped with a DB17-MS column (25 m×0.20 mm i.d., 0.33 μm film). Reactions with air- or water-sensitive reagents were carried out in oven-dried glassware under argon. Specific rotations were obtained on a Rudolph Autopol IV digital polarimeter (Hackettstown, NJ, USA) as CH<sub>2</sub>Cl<sub>2</sub>, EtOH or CHCl<sub>3</sub> solutions. Five sequential measurements of each chiral compound were acquired and then averaged to obtain the reported specific rotations.

### (*R*)-2-Methylbutan-1-ol [(*R*)-1]

Vinyl acetate (41.9 ml, 454 mmol) was added to a solution of racemic 2-methylbutan-1-ol (12.35 ml, 114 mmol) in dry dichloromethane (220 ml) and the mixture was stirred for 5 min; *Pseudomonas fluorescens* lipase (980 mg, 300 U mmol<sup>-1</sup> of substrate, Aldrich Chemical Co.) was then added in one portion. The resulting mixture was stirred for 30 h, monitoring the enantiomeric excess of (*R*)-1 via chiral stationary phase gas chromatography (GC). The crude product was chromatographed on silica gel (60 g). Elution with hexane/EtOAc (9:1) afforded 1.88 g of pure (*R*)-1, which had the following properties: [α]<sub>D25</sub> = +13.46 (*c* = 2.5, EtOH); ν<sub>max</sub> (neat): 3336 (br m), 2956 (s), 2923 (s), 2855 (s), 1465 (m), 1378 (w), 1032 (s), 938 (w), 908 (w), 842 (w) 723 (w); <sup>1</sup>H NMR, δ<sub>H</sub>(CDCl<sub>3</sub>): 0.89 (6H, m), 1.17 (2H, m), 1.18 (1H, m), 1.87 (1H, broad s, OH), 3.45 (1H, dd, *J* = 11.7 Hz, 4.8 Hz), 3.47 (1H, dd, *J* = 11.8 Hz, 5.3 Hz); <sup>13</sup>C NMR, δ<sub>C</sub> (CDCl<sub>3</sub>): 14.0, 16.8, 27.0, 33.8, 68.5; gas chromatography-mass spectrometry (GC-MS) [column: DB-5MS, 5% phenylmethylsiloxane, 30 m×0.25 mm i.d.; carrier gas, He; temperature, 40–280°C

(+5°C min<sup>-1</sup>); retention time (*t*<sub>R</sub>), 4.51 min (96.5%); MS (70 eV, EI); *m/z*: 87 (1, M<sup>+</sup>-1), 70 (35), 56 (100), 41 (70). The enantiomeric excess (ee) was determined by GC analysis using a β-DEX225 column [30 m×0.25 mm i.d.×0.25 μm film; J&W Scientific, Folsom, CA, USA; carrier gas, He; temperature, 35–220°C (held at 35°C for 30 min, then +5°C min<sup>-1</sup>); *t*<sub>R</sub>, 43.95 min (100%).

### (*R*)-2-Methylbutan-1-yl triflate [(*R*)-2]

Pyridine (1.31 ml, 16.3 mmol) and triflic anhydride (3.34 ml, 19.56 mmol) were added sequentially to a cold (−10°C) stirred solution of (*R*)-1 (1.44 g, 16.3 mmol) in dry CH<sub>2</sub>Cl<sub>2</sub> (80 ml). The mixture was stirred at −10°C for 1 h and then diluted with pentane (160 ml) and stirred for 30 min. The resulting mixture was filtered through a plug of silica gel (30 g), and the filter cake was washed with hexane/CH<sub>2</sub>Cl<sub>2</sub> (4:1). The filtrate was concentrated *in vacuo* to give 3.59 g (quantitative) of (*R*)-2 as a colorless oil, which was used immediately in the next step without further purification or characterization.

### (*S*)-2-Methylbutan-1-yl triflate [(*S*)-2]

In the same manner as above, (*S*)-2-methylbutan-1-ol [(*S*)-1] (1.45 g, 16.5 mmol; Alfa Aesar) gave 3.63 g (quantitative) of (*S*)-2 as a colorless oil, which was used immediately without further purification or characterization.

### (*R*)-*tert*-Butyldimethyl((13-methylpentadecyl)oxy)silane [(*R*)-3]

To a cold (−40°C) solution of (*R*)-2 (3.59 g, 16.3 mmol) in Et<sub>2</sub>O (60 ml), Li<sub>2</sub>CuCl<sub>4</sub> (0.394 mol l<sup>-1</sup>, 2 ml, 0.75 mmol, 5 mol % catalyst) was added dropwise, and the reaction was stirred for 10 min. (11-((*tert*-Butyldimethylsilyloxy)undecyl)magnesium bromide (2.0 mol l<sup>-1</sup>, 7.5 ml, 15 mmol) was then added to the reaction mixture over 15 min by syringe pump. The mixture was stirred for 2 h at −40°C until the Grignard was fully consumed, then warmed to room temperature and quenched with saturated aqueous NH<sub>4</sub>Cl (40 ml). The layers were separated and the aqueous layer was extracted with hexane (2×75 ml). The combined organic layers were washed with saturated NH<sub>4</sub>Cl (2×100 ml) and brine (2×100 ml), dried over Na<sub>2</sub>SO<sub>4</sub>, and concentrated *in vacuo*. The crude product was chromatographed on silica gel (60 g), eluting with hexane/EtOAc (9:1) to yield 4.39 g (82%) of pure (*R*)-3 as a colorless oil. (*R*)-3 showed the following properties: [α]<sub>D25</sub> = −3.87 ± 0.013 (*c* = 2.70, CH<sub>2</sub>Cl<sub>2</sub>); <sup>1</sup>H NMR, δ<sub>H</sub> (CDCl<sub>3</sub>): 0.21 (6H, s), 0.85 (3H, d, *J* = 7.8 Hz), 0.89 (3H, pseudotriplet, *J* = 7.6 Hz), 0.98 (9H, s), 1.25 (22H, br m), 1.48 (2H, m), 1.52 (1H, m), 3.6 (2H, t, *J* = 7.6 Hz); <sup>13</sup>C NMR, δ<sub>C</sub> (CDCl<sub>3</sub>): −1.90, 11.5, 22.0, 26.7, 28.2, 29.3, 29.7, 30.2, 30.5, 31.3, 33.0, 36.5, 38.0, 63.0; GC-MS [column: DB-5MS, 5% phenylmethylsiloxane, 30 m×0.25 mm i.d.; carrier gas, He; temperature, 100–280°C (+10°C min<sup>-1</sup>); *t*<sub>R</sub>, 16.24 min (98.5%); MS of (*R*)-3 (70 eV, EI); *m/z*: 299 (41, M<sup>+</sup>-57), 171 (1), 143 (5), 129 (2), 111 (6), 97 (17), 89 (21), 75 (100), 57 (42), 41(42).

### (*S*)-*tert*-Butyldimethyl((13-methylpentadecyl)oxy)silane [(*S*)-3]

In the same manner as above, (*S*)-2 (3.5 g, 15.9 mmol) gave 4.10 g (76%) of pure (*S*)-3 as a colorless oil: [α]<sub>D25</sub> = +3.95 ± 0.03 (*c* = 2.70, CH<sub>2</sub>Cl<sub>2</sub>).

### (*R*)-13-Methyl-1-bromopentadecane [(*R*)-4]

Bromine (1.43 ml, 27.6 mmol) was added dropwise to a cold (−10°C) solution of PPH<sub>3</sub> (7.38 g, 27.6 mmol) in dry CH<sub>2</sub>Cl<sub>2</sub> (100 ml) with vigorous stirring. The reaction was slowly warmed to room temperature over 30 min and stirred another 30 min. (*R*)-3 (3.71 g, 10.4 mmol) was then slowly added to the reaction mixture

and the resulting solution was stirred for 1.5 h. The reaction mixture was diluted with hexane (200 ml) and filtered through a plug of silica gel (15 g), eluting with hexane. The eluate was concentrated *in vacuo* to give 3.03 g (95.3%) of (*R*)-4 as a colorless oil with the following properties:  $[\alpha]_{D25} = -3.35 \pm 0.05$  ( $c = 1.90$ ,  $\text{CH}_2\text{Cl}_2$ ),  $^1\text{H NMR}$ ,  $\delta_{\text{H}}(\text{CDCl}_3)$ : 0.90 (3H, t,  $J = 7.6$  Hz), 0.98 (3H, d,  $J = 6.8$  Hz), 1.31 (20H, broad m), 1.54 (2H, m), 1.65 (1H, m), 1.85 (2H, m), 3.46 (2H, pseudotriplet,  $J = 7.4$  Hz);  $^{13}\text{C NMR}$ ,  $\delta_{\text{C}}(\text{CDCl}_3)$ : 11.8, 20.5, 27.1, 28.5, 29.8, 30.0, 30.2, 33.5, 32.1, 33.7, 35.5, 37.8; GC-MS [column: DB-5MS, 5% phenylmethylsiloxane, 30 m  $\times$  0.25 mm i.d.; carrier gas, He; temperature, 100–280°C (+10°C min $^{-1}$ );  $t_{\text{R}}$ , 14.14 min (99.5%); MS of (*R*)-4 (70 eV, EI);  $m/z$ : 306 (5,  $[\text{M}^+ + 2]$ ), 304 (5,  $\text{M}^+$ ), 275 (3), 221 (1), 207 (1), 179 (1), 163 (1), 149 (1), 135 (1), 113 (3), 97 (8), 85 (12), 71 (28), 57 (100), 41 (58).

#### (*S*)-13-Methyl-1-bromopentadecane [(*S*)-4]

In the same manner as described above, 3.0 g (8.4 mmol) of (*S*)-3 gave 2.38 g (93% yield, 97.9% ee) of (*S*)-4 as a colorless oil,  $[\alpha]_{D25} = +3.41 \pm 0.05$  ( $c = 1.90$ ,  $\text{CH}_2\text{Cl}_2$ ). Its spectra were identical to those of (*R*)-4.

#### (*R*)-29-Methyl-15-hentriacontyne [(*R*)-5]

*n*-BuLi (2.89 mol l $^{-1}$  in hexane, 1.32 ml, 3.82 mmol) was added dropwise to a cold (−78°C) solution of 1-hexadecyne (682 mg, 3.07 mmol) in dry THF (15 ml) and the resulting mixture was stirred at −78°C for 10 min, then at −10°C for 30 min. After warming to 25°C, (*R*)-4 (800 mg, 2.63 mmol) dissolved in dry THF (3 ml) was added dropwise. A reflux condenser was added to the reaction apparatus and the mixture was heated to a gentle reflux and stirred overnight. The resulting mixture was then cooled to 25°C, quenched with saturated aqueous  $\text{NH}_4\text{Cl}$ , and extracted with hexane. The organic layer was washed with water (2  $\times$  50 ml), aqueous  $\text{NaHCO}_3$  (2  $\times$  50 ml) and brine (50 ml), dried and concentrated. Unreacted 1-hexadecyne was removed by Kugelrohr distillation of the crude product (oven temperature, 60°C; 0.1 mmHg). The residue was chromatographed over silica gel (50 g). Elution with hexane gave 890 mg (2.15 mmol, 82%) of (*R*)-5 as a clear oil.  $[\alpha]_{D25} = -3.11$  ( $c = 3.47$ ,  $\text{CH}_2\text{Cl}_2$ );  $v_{\text{max}}$  (neat): 2954 (m), 2921 (s), 2852 (s), 1464 (m), 1377 (w), 1251 (w), 1056 (m), 843 (w), 721 (w);  $^1\text{H NMR}$ ,  $\delta_{\text{H}}(\text{CDCl}_3)$ : 0.86 (6H, m), 0.91 (3H, d,  $J = 6.4$  Hz), 1.1–1.4 (48H, br m), 1.55 (1H, m), 2.35 (4H, m);  $^{13}\text{C NMR}$ ,  $\delta_{\text{C}}(\text{CDCl}_3)$ : 14.32, 18.99, 19.74, 20.9, 26.39, 27.27, 28.61, 29.05, 29.38, 29.58, 29.79, 29.91, 32.12, 33.07, 36.26, 79.56, 81.2; GC-MS [column: DB-5MS, 5% phenylmethylsiloxane, 30 m  $\times$  0.25 mm i.d.; carrier gas, He; temperature, 100–280°C (+10°C min $^{-1}$ );  $t_{\text{R}}$ , 33.52 min (97.3%); MS of (*R*)-5 (70 eV, EI);  $m/z$ : 446 (1,  $\text{M}^+$ ), 417 (16), 355 (2), 324 (1), 281 (1), 225 (3), 197 (2), 141 (3), 113 (2), 85 (11), 71 (25), 57 (100), 41 (88); high-resolution MS (EI) calculated for  $\text{C}_{32}\text{H}_{62}$  ( $\text{M}^+$ ): 446.4852; found: 446.4858.

#### (*S*)-29-Methyl-15-hentriacontyne [(*S*)-5]

In the same manner as described above, 711 mg (2.34 mmol) of (*S*)-4 gave 846 mg (80% yield) of (*S*)-5 as a colorless oil.  $[\alpha]_{D25} = +3.15 \pm 0.05$  ( $c = 2.10$ ,  $\text{CH}_2\text{Cl}_2$ ). Its spectra were identical to those of (*R*)-5. High-resolution MS (EI) calculated for  $\text{C}_{32}\text{H}_{62}$  ( $\text{M}^+$ ): 446.4852; found: 446.4847.

#### (*R*)-3-Methylhentriacontane [(*R*)-6]

A solution of (*R*)-5 (800 mg, 1.79 mmol) in hexane (5 ml) was added to a slurry of 5% rhodium on carbon (80 mg) and anhydrous

$\text{Na}_2\text{CO}_3$  (700 mg, 5.2 mmol) in hexane (10 ml) and the resulting mixture was stirred for 10 h under a slight positive pressure of  $\text{H}_2$ . The mixture was filtered through a plug of silica gel and concentrated to afford 763 mg of crude crystalline (*R*)-3-methylnonacosane. Recrystallization from hexane/acetone (1:5, 25 ml) gave 737 mg of (91.5% yield) (*R*)-6 in 58% overall yield in 5 steps; melting point, 34°C;  $[\alpha]_{D25} = -3.05 \pm 0.01$  ( $c = 2.50$ ,  $\text{CH}_2\text{Cl}_2$ );  $\delta_{\text{H}}(\text{CDCl}_3)$ : 0.84 (3H, d,  $J = 6.3$  Hz), 0.85 (3H, t,  $J = 6.7$  Hz), 0.87 (3H, t,  $J = 6.5$  Hz), 1.16–1.4 (56 H, broad m), 1.53 (1H, m);  $^{13}\text{C NMR}$ ,  $\delta_{\text{C}}(\text{ppm})$ : 11.62, 14.32, 19.45, 22.91, 25.67, 27.36, 29.58, 29.72, 29.93, 30.25, 31.81, 32.16, 34.62, 36.88; GCMS [column: DB-17MS, 17% phenylmethylsiloxane, 30 m  $\times$  0.25 mm i.d.; carrier gas, He; temperature, 100–280°C (+20°C min $^{-1}$ );  $t_{\text{R}}$ , 14.12 min (100%); MS of (*R*)-6 (70 eV, EI); 421 (54,  $\text{M}^+ - 29$ ), 407 (1), 393 (6), 379 (1), 365 (1), 351 (1), 337 (1), 323 (1), 309 (2), 295 (2), 281 (2), 267 (2), 253 (2), 239 (3), 225 (3), 211 (2), 197 (3), 183 (3), 169 (6), 155 (7), 141 (10), 127 (12), 113 (17), 99 (23), 85 (55), 71 (70), 57 (100), 43 (45). High-resolution MS (EI) calculated for  $\text{C}_{32}\text{H}_{66}$  ( $\text{M}^+$ ): 450.5165; found: 450.5159.

#### (*S*)-3-Methylhentriacontane [(*S*)-6]

In the same manner as described above, 800 mg (1.79 mmol) of (*S*)-5 gave 746 mg (93% yield) of (*S*)-6 (53% overall yield).  $[\alpha]_{D25} = +3.01 \pm 0.05$  ( $c = 2.10$ ,  $\text{CH}_2\text{Cl}_2$ ); melting point, 36°C. Its spectra were identical to those of (*R*)-6. High-resolution MS (EI) calculated for  $\text{C}_{32}\text{H}_{66}$  ( $\text{M}^+$ ): 450.5165; found: 450.5169.

#### Treatments

Three types of solutions of synthetic 3-methylhentriacontane in pentane (HPLC grade; Sigma-Aldrich) were prepared: (*R*)-3-MeC $_{31}$  at a concentration of 0.01 mg ml $^{-1}$ , (*S*)-3-MeC $_{31}$  at a concentration of 0.01 mg ml $^{-1}$  and a racemic mixture of the two isomers at a concentration of either 0.005 mg ml $^{-1}$  each (for colony replicates A–C and for aggression experiments; see below) or 0.01 mg ml $^{-1}$  each (for colony replicates D–H; see below). The two racemic solutions were made in order to keep constant either the concentration of both compounds together or the concentration of each single compound (the response to the two solutions was not significantly different; see Results). For all bioassays, the treatment solutions were (1) treatment P: the pentane only control, (2) treatment M: racemic mixture of 3-MeC $_{31}$ , (3) treatment R: (*R*)-3-MeC $_{31}$  and (4) treatment S: (*S*)-3-MeC $_{31}$ . A glass dummy (1 mm diameter  $\times$  15 mm) was used as a surrogate queen, onto which 10  $\mu$ l of one of four different treatment solutions was deposited (i.e. 100 ng of compounds in all cases except replicates D–H, which had 200 ng of compounds for the racemic mixture), depending on the treatment. This dose is biologically relevant because queens have 100–200 ng of 3-MeC $_{31}$  on their cuticles (Holman et al., 2010a).

In all bioassays, the treatment order was randomized and the behavioral observations and dissections were conducted blind with respect to treatment.

#### Bioassay 1: effect of 3-MeC $_{31}$ on workers' ovarian development

In April 2014, three mature *L. niger* colonies (colonies A–C) located on the campus of the University of Paris 13 were excavated, and approximately 200 workers per colony were transferred to the laboratory and kept at 24°C, under 50% humidity and a 12 h:12 h day:night cycle. For each colony, four groups of 50 workers were placed in separate plastic boxes (8  $\times$  5  $\times$  4 cm), so that each group (sub-colony) could receive a different treatment. A cotton ball with



water was provided for moisture and the ants were fed 3 times a week with apple–honey mixture and *Drosophila* fruit flies.

After an acclimatization period of 2 days, treatment with synthetic hydrocarbons commenced. Each of the plastic boxes received a glass dummy treated with one of the four different treatment solutions (P, M, R, S) each working day. For each deposition of the treatment solution, the glass dummy was removed from the nest box, cleaned with pentane and placed onto a clean glass surface. Then, 10  $\mu$ l of the respective treatment solution was applied onto the dummy and, after the pentane had evaporated, the dummy was placed back into the nest box. Each sub-colony was treated 19 times over a period of 26 days. The ants then were dissected to assess the development of their ovaries. In April 2015, the experiment was repeated with 5 additional colonies (D–H).

After the treatment period, workers were frozen at  $-20^{\circ}\text{C}$  for at least 10 min. Ovaries were dissected and ovarian development was scored as 0 for undeveloped ovaries without any developing oocytes or 1 for developed ovaries containing oocytes [we had initially scored ovarian development as in Holman et al., 2010a, but there was no difference between a model considering the different scores and the binomial model (0/1), so we retained the simple binomial model]. Although in general most of the oocytes produced by workers fail, queenless workers do increase the production of viable oocytes compared with queenright workers (Khila and Abouheif, 2008); therefore, the presence of oocytes indicates reproductive attempts. The proportion of workers with developed ovaries was analyzed using GLMM with binomial errors, with colony as random factor to account for within-colony similarities, and treatment and replicate set (2014 or 2015) as fixed factors. A main effect model, i.e. without an interaction term, proved to have the highest explanatory power, as measured by the Akaike information criterion (AIC).

## Bioassay 2: aggression elicited by synthetic hydrocarbons

### Experiment a: tests in neutral arenas

In this experiment, workers from 29 additional queenright laboratory colonies kept at  $24^{\circ}\text{C}$ , 50% humidity, and a 12 h:12 h day:night cycle were tested. These ants were descendants of mated queens collected in July 2012 in Paris. Colonies were housed in plastic boxes (15 $\times$ 10 $\times$ 3 cm) provided with two small tubes: one filled with water, blocked with a cotton wick, to maintain a humid environment; the other containing only wet cotton at the bottom as a refuge for the queen and workers. Ants were fed three times a week with apple–honey mixture and *Drosophila*. For each trial, five workers were taken randomly from their nest and placed into a circular plastic arena (7 cm diameter). After 10 min of acclimation, the test began. Each colony was tested with the four different treatments, using different groups of five workers for each treatment. We placed a glass dummy treated with one of the solutions (P, M, R, S) in the center of the arena and observed the behavior of the ants for 3 min, recording the frequency of the behaviors antennation, mandible opening and biting. Of these, mandible opening and biting were considered aggressive, whereas antennation was scored as non-aggressive. A trial was disregarded if the ants had no contact at all with the dummy.

### Experiment b: tests in queenless nests

In this experiment, we used 26 colonies founded in the laboratory, composed of approximately 60 individuals housed in plastic boxes (15 $\times$ 10 $\times$ 3 cm) as described above. From each colony, the queen with her eggs, pupae and 10 workers were removed from the nest box the day before the test and placed in a different plastic box (8 $\times$ 5 $\times$ 4 cm), so the remainder of the workers (approximately 50

workers) were queenless. The test consisted of placing a glass dummy treated with one of the solutions (P, M, R, S) at approximately 1 cm from the entrance of the refuge tube. We then observed and recorded the ant behaviors for 3 min as described above in experiment a. All the treatments were tested in a random order in each colony and we allowed an interval of at least 1 h between two consecutive tests in the same colony.

### Experiment c: tests in the presence of the queen

In this experiment, we tested the colony fragments containing the queens with their 10 workers (see above). We put a treated glass dummy (P, M, R, S) at approximately 1 cm from the queen and observed the behavior of the workers for 3 min, as described above.

All behaviors were recorded using the software Etholog 2.2 (Ottoni, 2000). The frequencies of behaviors of each of these three sub-experiments were arranged into two columns, non-aggressive and aggressive, and were analyzed using a binomial mixed model, with colony as a random factor to account for within-colony similarities, whereas treatment (P, M, R, S) and experiment (a, b, c) were entered as fixed factors. The model with the highest explanatory power (i.e. the lowest AIC) was a main effect model. Statistical analyses were carried out in R (v3.1.2, R Development Core Team) using the packages lme4 (v1.1-7) and effects (v3.0-3).

## RESULTS

### Synthesis of the enantiomers of 3-MeC<sub>31</sub>

The synthesis of (*R*)-3-MeC<sub>31</sub> (Fig. 1) began with the kinetic resolution of ( $\pm$ )-2-methylbutan-1-ol with *P. fluorescens* lipase and vinyl acetate in dry CH<sub>2</sub>Cl<sub>2</sub> (Barth and Effenberger, 1993). This kinetic resolution enantioselectively esterifies (*S*)-(-)-2-methylalkanols to form the corresponding (*S*)-(-)-2-methylalkyl acetates while leaving the (*R*)-(+)-2-methylalkanols unchanged. (*R*)-(+)-2-Methylbutan-1-ol [(*R*)-1] was isolated from the mixture by column chromatography and the enantiomeric purity was measured by gas chromatography on a  $\beta$ -Dex225 chiral stationary phase column (ee >98%). (*R*)-1 was then treated with triflic anhydride and pyridine to form (*R*)-(+)-2-methylbutan-1-yl triflate [(*R*)-2], which subsequently underwent a Li<sub>2</sub>CuCl<sub>4</sub>-catalyzed cross-coupling reaction with 11-(*tert*-butyldimethylsilyloxy)undecylmagnesium bromide to form (*R*)-3 (82% yield) (Cahiez et al., 2000; Wang and Zhang, 2008). Protected alcohol (*R*)-3 was then converted directly to

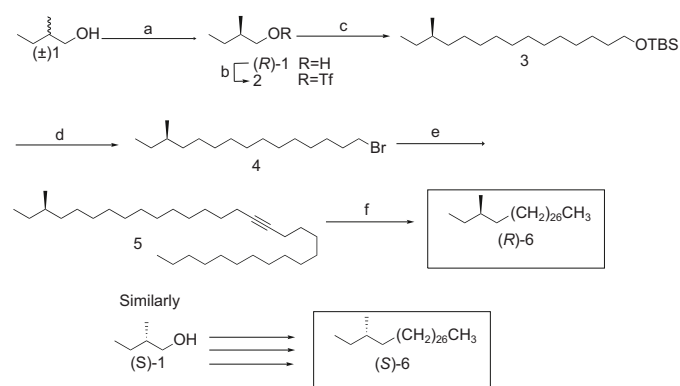

**Fig. 1. Synthesis of (*R*)-3-methylhentriacontane [(*R*)-6] and (*S*)-3-methylhentriacontane [(*S*)-6] via intermediates 1–5.** (a) *Pseudomonas fluorescens* Amano lipase, vinyl acetate, CH<sub>2</sub>Cl<sub>2</sub>; (b) Tf<sub>2</sub>O, pyridine, CH<sub>2</sub>Cl<sub>2</sub> (quantitative); (c) 11-(*tert*-butyldimethylsilyloxy)undecylmagnesium bromide, Li<sub>2</sub>CuCl<sub>4</sub>, Et<sub>2</sub>O (82%); (d) Ph<sub>3</sub>PBr<sub>2</sub>, CH<sub>2</sub>Cl<sub>2</sub> (95%); (e) hexadecynyllithium, tetrahydrofuran (THF), reflux (85%); (f) 5% Rh/C, H<sub>2</sub>, hexane (92%, 58% overall yield).

the corresponding bromide (*R*)-4 by treatment with  $\text{Ph}_3\text{PBr}_2$  in dichloromethane at  $-10^\circ\text{C}$ , with  $\text{Ph}_3\text{PBr}_2$  being prepared *in situ* by addition of  $\text{Br}_2$  to  $\text{Ph}_3\text{P}$  in dichloromethane at  $-78^\circ\text{C}$  (Aizpurua et al., 1986). Dilution of the reaction mixture with hexane (3× reaction volume) resulted in the precipitation of triphenylphosphine oxide, which was removed by filtration. The silyl alcohol byproduct was removed from the desired alkyl bromide by Kugelrohr distillation. Alkynylation of (*R*)-4 with 1-hexadecynyllithium in refluxing THF produced 29-methylhentriacont-15-yne (*R*)-5 (Buck and Chong, 2001), which was subsequently reduced to the desired methylalkane (*R*)-6 via Rh/C-catalyzed hydrogenation (58% overall yield) (Zou and Millar, 2010).

(*S*)-6 was obtained in similar fashion by substitution of commercially available (*S*)-(-)-2-methylbutan-1-ol for (*R*)-(+)-2-methylbutan-1-ol in the first step.

### Bioassay 1: effect of 3-MeC<sub>31</sub> on worker ovarian development

Worker ovarian development was significantly different between treatments (binomial GLMM with colony as random factor,  $\chi^2=10.95$ ,  $P=0.012$ ; Fig. 2) but not significantly different between our two sets of experiments (2014 and 2015;  $\chi^2=0.89$ ,  $P=0.35$ ). The racemic 3-MeC<sub>31</sub> treatment (treatment M) yielded a significantly smaller proportion of workers with developed ovaries than the solvent control (treatment P; M versus P,  $z=-2.95$ ,  $P=0.003$ ). The treatments with the pure (*R*)- and (*S*)-enantiomers also resulted in significant decreases in the proportion of workers with developed ovaries compared with the control (R versus P:  $z=-2.43$ ,  $P=0.015$ ; S versus P:  $z=-2.42$ ,  $P=0.015$ ). The effect of the two enantiomers appeared to be purely additive. This can be seen from the fact that when treatment was coded as two separate factors for the presence or absence of the two enantiomers, and the effect of the two enantiomers was tested in a full factorial model, there was no significant interaction between the effect of the two enantiomers ( $z=1.24$ ,  $P=0.22$ ).

### Bioassay 2: aggression elicited by synthetic hydrocarbons

We consistently found reduced aggression towards treatment S compared with the control treatment P in all three experiments,

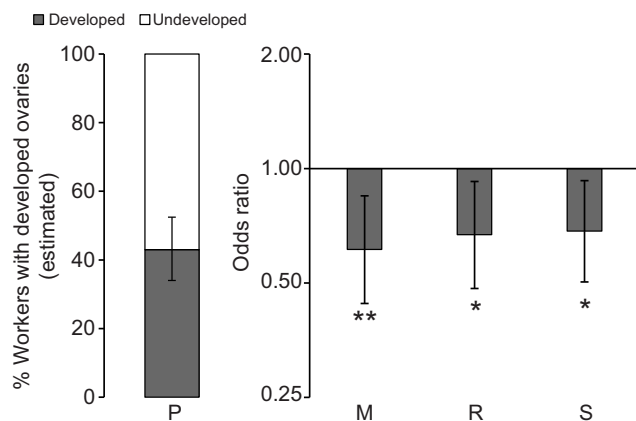

**Fig. 2. Effect of the two enantiomers and the racemic mixture of the queen pheromone 3-methylhentriacontane (3-MeC<sub>31</sub>) on worker ovary development.** Effects are presented as the ratio of the odds that workers developed their ovaries (right) compared with the pentane control condition (P, left;  $N=8$  colonies/351 dissected workers) as estimated from a GLMM. Error bars depict 95% confidence intervals (CI). A significant difference is inferred if the 95% CI of the odds ratio does not include 1. M, racemic mixture ( $N=8$  colonies/306 dissected workers); R, (*R*)-enantiomer ( $N=8$  colonies/309 dissected workers); S, (*S*)-enantiomer ( $N=8$  colonies/369 dissected workers). \* $P<0.05$ , \*\* $P<0.01$ .

testing queenright ants immediately after removal from the nest (experiment a; Fig. 3), queenless ants kept separated from the queen for 24 h (experiment b), and workers with the queen present (experiment c) (binomial GLMM with colony as random factor, S versus P,  $z=-4.13$ ,  $P<0.001$ ). However, this was not the case for treatments R and M, neither of which was different from the control (R versus P,  $z=-0.95$ ,  $P=0.343$ ; M versus P,  $z=-0.31$ ,  $P=0.76$ ). In a full factorial analysis, the interaction term between experiment and treatment was not significant, but we did find significantly elevated aggression in the presence of the queen (experiment c, using Tukey contrasts, experiment c versus experiment b,  $z=5.66$ ,  $P<0.001$ ; experiment c versus experiment a,  $z=4.97$ ,  $P<0.001$ ; Fig. 3).

### DISCUSSION

The queen pheromone of social insects is hypothesized to elicit both longer term primer effects that result in changes in the physiology of the receiver and more immediate releaser effects that are expressed as a change in behavior upon perception of the pheromone (for *Lasius* ants, see Holman et al., 2010a, 2013). The primer effects are typically manifested as the inhibition of worker reproduction, whereas the releaser effects include inhibition of aggression and/or display of stereotyped submissive behaviors (e.g. Smith et al., 2015). For instance, for the honey bee, one component of the queen pheromone, 9-oxo-(*E*)-2-decenoic acid (9-ODA), reduces ovarian development in workers while also inducing retinue behavior (Keeling et al., 2003; Le Conte and Hefetz, 2008).

Our experiments confirmed that the *L. niger* queen pheromone component 3-MeC<sub>31</sub> has both primer and releaser effects, but that these two distinct effects might be mediated by different enantiomers. Both the (*R*)- and (*S*)-enantiomers, as well as the racemic mixture of the two, inhibited ovarian development in field-collected workers when applied for extended periods of time, whereas the (*S*)-enantiomer reduced aggression towards objects treated with it in lab-reared workers (i.e. appeasing workers surrounding the queen). The level of aggressive behavior towards the (*R*)-enantiomer was similar to that shown towards the racemic mixture (treatment M) and the pentane control (treatment P).

It was unexpected that the primer and releaser effects would appear to be mediated by different enantiomers, or that the (*S*)-enantiomer would be active at all, because, as noted in the Introduction, a recent study has suggested that the large majority of methyl-branched hydrocarbons in insect cuticular lipids are likely to have the (*R*)-configuration (Bello et al., 2015). However, our results are consistent with the study by Sharma et al. (2015), who showed that the sensilla present on the antennae of *Camponotus* ants respond to both (*R*)- and (*S*)-enantiomers and that ants are able to discriminate between these enantiomers in behavioral tests.

We found that the mixture of the two enantiomers had a similar effect on the inhibition of worker ovary development to that of the (*R*)- and (*S*)-enantiomers alone, suggesting that the enantiomers have an equal, additive effect on ovary development. Our results therefore suggest that the queen-produced pheromone in *L. niger* might actually consist of a mixture of the two enantiomers. One possible evolutionary scenario that might explain these results is a molecule that initially has evolved a pheromonal function (e.g. primer effect) and then its enantiomer acquires another purpose (e.g. releaser effect). This complex process would be an example of co-option/change (Oi et al., 2015; Holman et al., 2010a; Wyatt, 2014). Alternatively, queens might parsimoniously produce only a single enantiomer, the (*S*)-isomer, fulfilling both functions. In this case, one would expect to see the other enantiomer having a lesser or no effect (depending on the specificity of the receptor for the

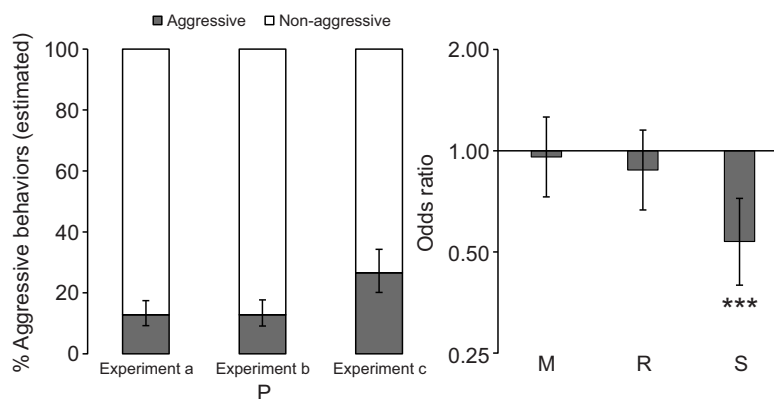

**Fig. 3. Effect of the two enantiomers and the racemic mixture of the queen pheromone 3-MeC<sub>31</sub> on worker aggressive responses.** Effects are presented as the ratio of the odds that workers displayed aggressive behavior (right) compared with the pentane control condition (P, left;  $N=68$  replicates/785 observed behaviors) as estimated from a GLMM. There was significantly elevated aggression in experiment c (experiment a versus c,  $z=7.317$ ,  $P<0.001$ ; experiment b versus c,  $z=6.682$ ,  $P<0.001$ ). Experiment a tested queenright ants immediately after removal from the nest, experiment b tested queenless ants kept separated from the queen for 24 h, and experiment c tested workers with the queen present. Error bars depict 95% CI. A significant difference is inferred if the 95% CI of the odds ratio does not include 1. M, racemic mixture ( $N=64$  replicates/712 observed behaviors); R, (*R*)-enantiomer ( $N=69$  replicates/744 observed behaviors); S, (*S*)-enantiomer ( $N=68$  replicates/693 observed behaviors). \* $P<0.05$ , \*\* $P<0.01$ .

pheromone), or conversely, this enantiomer should elicit only an aggressive behavioral response if it were simply perceived as unnatural or foreign, analogous to the aggressive responses elicited by the cuticular lipids of non-nestmates (van Zweden and d'Ettorre, 2010; Ozaki and Hefetz, 2014). However, there are cases in which the non-natural stereoisomer actually has a higher bioactivity than the naturally occurring one (Eliyahu et al., 2004), which would match our results if the (*S*)-isomer does not occur naturally in *L. niger*.

There also are several instances of insects using blends of enantiomers as pheromones (e.g. bark beetles, grain beetles, Lepidoptera; reviewed in Mori, 1998, 2007). For the olive fly, *Dacus oleae*, males and females produce a racemic mixture of their spiroacetal pheromone olean, but the sexes respond differently to the two enantiomers (Haniotakis et al., 1986). Unfortunately, the technology does not yet exist to determine the enantiomeric ratio of the ~100 ng quantities of 3-MeC<sub>31</sub> that are present on the cuticle of a *L. niger* queen by analytical chemistry methods (Bello et al., 2015). Thus, our interpretation of the results described above remains somewhat speculative, until the enantiomer or blend of enantiomers produced by *L. niger* queens can be conclusively determined.

#### Acknowledgements

Many thanks to Chloé Leroy and Paul Devienne, University of Paris 13, for technical assistance. We thank two anonymous reviewers for useful comments on the manuscript.

#### Competing interests

The authors declare no competing or financial interests.

#### Author contributions

M.M.d.N., J.S.v.Z. and P.d'E. conceived and designed the experiments; J.E.B. and J.G.M. synthesized the chemical compounds; M.M.d.N. conducted the experiments; J.S.v.Z. and T.W. analyzed the data; M.M.d.N. and P.d'E. drafted the manuscript; all authors revised the manuscript.

#### Funding

The study was supported by a Marie Curie Reintegration Grant from the European Commission to P.d'E. (FP7-MC-ERG-2009-256524) and a postdoctoral fellowship of the Research Foundation Flanders to J.S.v.Z. (FWO 12Q7615N).

#### References

Aizpurua, J. M., Cossio, F. P. and Palomo, C. (1986). Reagents and synthetic methods. 61. Reaction of hindered trialkylsilyl esters and trialkylsilyl ethers with

triphenylphosphine dibromide: preparation of carboxylic acid bromides and alkyl bromides under mild neutral conditions. *J. Org. Chem.* **51**, 4941–4943.

Alaux, C., Boutot, M., Jaisson, P. and Hefetz, A. (2007). Reproductive plasticity in bumblebee workers (*Bombus terrestris*)—reversion from fertility to sterility under queen influence. *Behav. Ecol. Sociobiol.* **62**, 213–222.

Barth, S. and Effenberger, F. (1993). Lipase-catalyzed resolution of racemic 2-alkyl substituted 1-alkanols. *Tetrahedron Asymm.* **4**, 823–833.

Bello, J. E., McElfresh, J. S. and Millar, J. G. (2015). Isolation and determination of absolute configurations of insect-produced methyl-branched hydrocarbons. *Proc. Natl. Acad. Sci. USA* **112**, 1077–1082.

Buck, M. and Chong, J. M. (2001). Alkylation of 1-alkynes in THF. *Tetrahedron Lett.* **42**, 5825–5827.

Cahiez, G., Chaboche, C. and Jézéquel, M. (2000). Cu-catalyzed alkylation of Grignard reagents: a new efficient procedure. *Tetrahedron Lett.* **56**, 2733–2737.

Cole, B. J. (1984). Colony efficiency and the reproductive effect in *Leptothorax allardycei* (Mann). *Insectes Soc.* **31**, 403–407.

Cuvillier-Hot, V., Lenoir, A., Crewe, R., Malosse, C. and Peeters, C. (2004). Fertility signalling and reproductive skew in queenless ants. *Anim. Behav.* **68**, 1209–1219.

d'Ettorre, P., Heinze, J., Schulz, C., Francke, W. and Ayasse, M. (2004). Does she smell like a queen? Chemoreception of a cuticular hydrocarbon signal in the ant *Pachycondyla inversa*. *J. Exp. Biol.* **207**, 1085–1091.

Dietemann, V., Peeters, C., Liebig, J., Thivet, V. and Hölldobler, B. (2003). Cuticular hydrocarbons mediate discrimination of reproductives and nonreproductives in the ant *Myrmecia gulosa*. *Proc. Natl. Acad. Sci. USA* **100**, 10341–10346.

Eliyahu, D., Mori, K., Takikawa, H., Leal, W. S. and Schal, C. (2004). Behavioral activity of stereoisomers and a new component of the contact sex pheromone of female German cockroach, *Blattella germanica*. *J. Chem. Ecol.* **30**, 1839–1848.

Haniotakis, G., Francke, W., Mori, K., Redlich, H. and Schurig, V. (1986). Sex-specific activity of (*R*)-(-) and (*S*)-(+)-1,7-dioxaspiro[5.5]undecane, the major pheromone of *Dacus oleae*. *J. Chem. Ecol.* **12**, 1559–1568.

Holman, L., Jørgensen, C. G., Nielsen, J. and d'Ettorre, P. (2010a). Identification of an ant queen pheromone regulating worker sterility. *Proc. R. Soc. B Biol. Sci.* **277**, 3793–3800.

Holman, L., Dreier, S. and d'Ettorre, P. (2010b). Selfish strategies and honest signalling: reproductive conflicts in ant queen associations. *Proc. R. Soc. B Biol. Sci.* **277**, 2007–2015.

Holman, L., Lanfear, R. and d'Ettorre, P. (2013). The evolution of queen pheromones in the ant genus *Lasius*. *J. Evol. Biol.* **26**, 1549–1558.

Keeling, C. I., Slessor, K. N., Higo, H. A. and Winston, M. L. (2003). New components of the honey bee (*Apis mellifera* L.) queen retinue pheromone. *Proc. Natl. Acad. Sci. USA* **100**, 4486–4491.

Khila, A. and Abouheif, E. (2008). Reproductive constraint is a developmental mechanism that maintains social harmony in advanced ant societies. *Proc. Natl. Acad. Sci. USA* **105**, 17884–17889.

Le Conte, Y. and Hefetz, A. (2008). Primer pheromones in social Hymenoptera. *Annu. Rev. Entomol.* **53**, 523–542.

Mori, K. (1998). Chirality and insect pheromones. *Chirality* **10**, 578–586.

Mori, K. (2007). Significance of chirality in pheromone science. *Bioorg. Med. Chem.* **15**, 7505–7523.

- Oi, C. A. van Zweden, J. S., Oliveira, R. C., Van Oystaeyen, A., Nascimento, F. S. and Wenseleers, T. (2015). The origin and evolution of social insect queen pheromones: novel hypotheses and outstanding problems. *Bioessays* **37**, 808-821.
- Oster, G. F. and Wilson, E. O. (1978). *Caste and Ecology in Social Insects*. Princeton, NJ: Princeton University Press.
- Otonari, E. B. (2000). EthoLog 2.2: a tool for the transcription and timing of behavior observation sessions. *Behav. Res. Meth. Ins. C.* **32**, 446-449.
- Ozaki, M. and Hefetz, A. (2014). Neural mechanisms and information processing in recognition systems. *Insects* **5**, 722-741.
- Peeters, C., Monnin, T. and Malosse, C. (1999). Cuticular hydrocarbons correlated with reproductive status in a queenless ant. *Proc. R. Soc. B Biol. Sci.* **266**, 1323-1327.
- Ratnieks, F. L. W. and Visscher, P. K. (1989). Worker policing in the honeybee. *Nature* **342**, 796-797.
- Sharma, K. R., Enzmann, B. L., Schmidt, Y., Moore, D., Jones, G. R., Parker, J., Berger, S. L., Reinberg, D., Zwiebel, L. J., Breit, B. et al. (2015). Cuticular hydrocarbon pheromones for social behavior and their coding in the ant antenna. *Cell Rep.* **12**, 1261-1271.
- Sledge, M. F., Boscaro, F. and Turillazzi, S. (2001). Cuticular hydrocarbons and reproductive status in the social wasp *Polistes dominulus*. *Behav. Ecol. Sociobiol.* **49**, 401-409.
- Smith, A. A., Millar, J. G. and Suarez, A. V. (2015). A social insect fertility signal is dependent on chemical context. *Biol. Lett.* **11**, 20140947.
- Trivers, R. L. and Hare, H. (1976). Haplodiploidy and the evolution of the social insect. *Science* **191**, 249-263.
- Van Oystaeyen, A., Oliveira, R. C., Holman, L., van Zweden, J. S., Romero, C., Oi, C. A., d'Ettorre, P., Khalesi, M., Billen, J., Wäckers, F. et al. (2014). Conserved class of queen pheromones stops social insect workers from reproducing. *Science* **343**, 287-290.
- van Zweden, J. S. and d'Ettorre, P. (2010). Nestmate recognition in social insects and the role of hydrocarbons. In *Insect Hydrocarbons: Biology, Biochemistry and Chemical Ecology* (ed. G. C. Blomquist and A.-G. Bagnères), pp. 222-243. Cambridge: Cambridge University Press.
- Vergoz, V., Schreurs, H. A. and Mercer, A. R. (2007). Queen pheromone blocks aversive learning in young worker bees. *Science* **317**, 384-386.
- Wang, S. and Zhang, A. (2008). An improved copper-catalyzed cross-coupling reaction of alkyl triflates with primary alkyl Grignard reagents. *Org. Prep. Proced. Int.* **40**, 293-301.
- Wenseleers, T. and Ratnieks, F. L. W. (2006a). Enforced altruism in insect societies. *Nature* **444**, 50.
- Wenseleers, T. and Ratnieks, F. L. W. (2006b). Comparative analysis of worker reproduction and policing in eusocial Hymenoptera supports relatedness theory. *Am. Nat.* **168**, E163-E179.
- Wenseleers, T., Helanterä, H., Hart, A. and Ratnieks, F. L. W. (2004). Worker reproduction and policing in insect societies: an ESS analysis. *J. Evol. Biol.* **17**, 1035-1047.
- Wenseleers, T., Tofilski, A. and Ratnieks, F. L. W. (2005). Queen and worker policing in the tree wasp *Dolichovespula sylvestris*. *Behav. Ecol. Sociobiol.* **58**, 80-86.
- Wyatt, T. D. (2014). *Pheromones and Signature Mixtures: Chemical Signals and Signatures*. Cambridge; New York: Cambridge University Press.
- Zou, Y. and Millar, J. G. (2010). Improved synthesis of (9Z)-9,13-tetradecadien-11-ynal, the sex pheromone of the avocado seed moth, *Stenoma catenifer*. *Tetrahedron Lett.* **51**, 1336-1337.
